# Supplementary material
Source: PubMed Central journal article supplement (PMC4494104)
Supplement: NIHMS510865-supplement-supplement_1.pdf [file NIHMS510865-supplement-supplement_1.pdf]

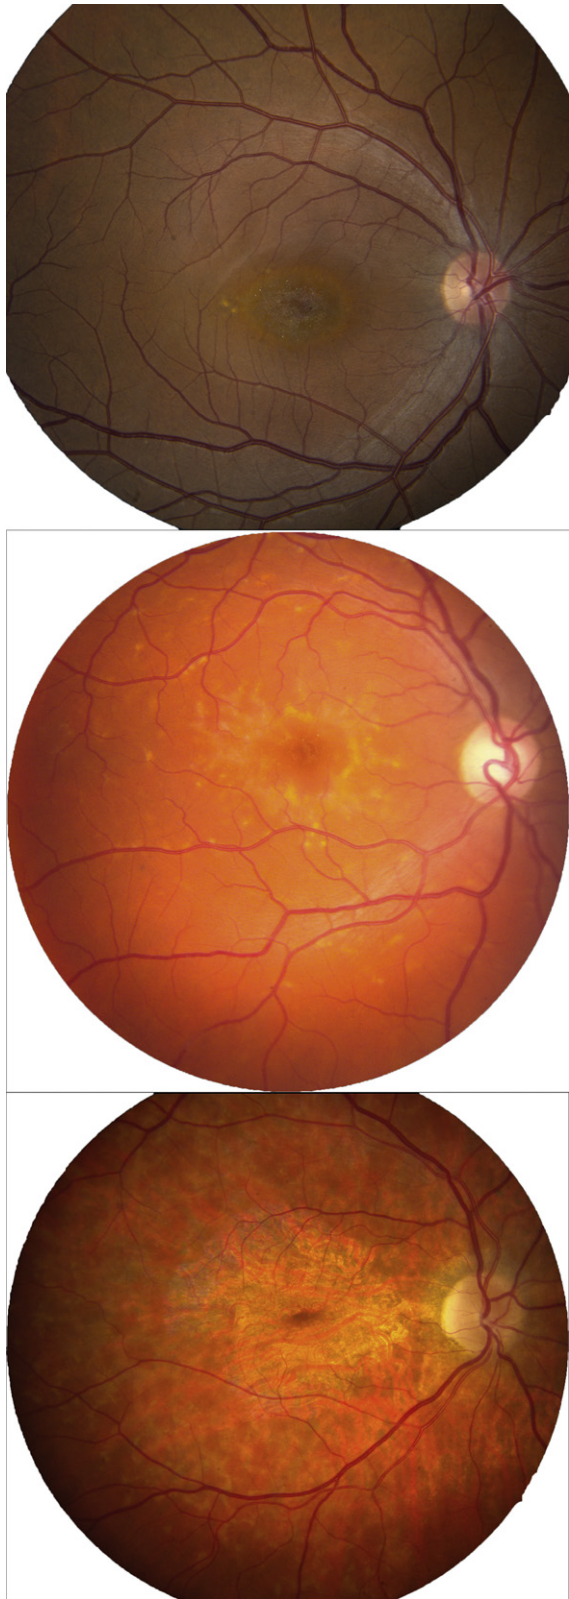

**SUPPLEMENTAL FIGURE.** Color fundus photographs representing (Top) stage 1, (Middle) stage 2, and (Bottom) stage 3 of Stargardt disease as described in the Methods.

---
